# Supplementary material
Source: publisher figshare collection journal article supplement (https://acs.figshare.com/ndownloader/files/8065568)

## Supporting Information (SI) for

### Surface Properties of Hydrotalcite-Based Zn(Mg)Al Oxides and Their Catalytic Activity in Aldol Condensation of Furfural with Acetone

Lucie Smoláková<sup>†</sup>, Karel Frolich<sup>\*†</sup>, Jaroslav Kocík<sup>†</sup>, Oleg Kikhtyanin<sup>‡</sup>, and Libor Čapek<sup>†</sup>

<sup>†</sup> *Department of Physical Chemistry, Faculty of Chemical Technology, University of Pardubice, Studentská 573, 532 10 Pardubice, Czech Republic*

<sup>‡</sup> *Research Institute of Inorganic Chemistry, RENTECH-UniCRE, Chempark Litvínov, Záluží – Litvínov, 436 70, Czech Republic*

<sup>\*</sup> Tel: +420-466037261; E-mail: [karel.frolich@upce.cz](mailto:karel.frolich@upce.cz)

## List of contents:

**Figure SI 1:** Adsorption isotherms of CO<sub>2</sub> at 34 °C on Mg<sub>2</sub>Al, Mg<sub>2</sub>Al (B), Zn<sub>1</sub>Mg<sub>1</sub>Al and Zn<sub>2</sub>Al mixed oxides.

*The measurement of adsorption isotherms was performed on homemade volumetric/manometric device equipped with capacitance pressure gauges (Pfeiffer Vacuum) connected to the calorimeter.*

*The curve limiting is shifted among samples according to the amount of adsorption sites. The curve shape among samples is comparable. Depicted isotherms are typical for systems where both chemisorption and physisorption occur. Near zero equilibrium pressure corresponds to the irreversible sorption of molecules, interaction energies higher than 50 kJ.mol<sup>-1</sup>. With increasing equilibrium pressure the reversible sorption takes place.*

**Figure SI 2:** FTIR spectra of the Mg<sub>2</sub>Al, Mg<sub>2</sub>Al (B), Zn<sub>1</sub>Mg<sub>1</sub>Al, and Zn<sub>2</sub>Al mixed oxides treated at 450 °C: detail on the region of OH stretching. Spectra are translated according to y axis.

*HT precursors contain large amount of water (and carbonates) in the interlayer. During the sample treating the intensity of OH stretching is decreasing due to water desorption (physisorbed and interacting with carbonates) and dehydroxylation of the sample. Relatively small amount of hydroxyls is still remaining after treatment even at 450 °C which is declared on attached spectra. These basic hydroxyls are responsible for the formation of bicarbonate species with CO<sub>2</sub> molecules.*

**Figure SI 3:** FTIR spectra of the CO<sub>2</sub> interaction with Mg<sub>2</sub>Al, Mg<sub>2</sub>Al (B), Zn<sub>1</sub>Mg<sub>1</sub>Al and Zn<sub>2</sub>Al mixed oxides: detail on the region of molecularly bound CO<sub>2</sub> (antisymmetric stretching vibration ( $\nu_3$ )). Spectra obtained at 100 mbar CO<sub>2</sub> equilibrium pressure (gas phase and activated sample spectrum subtracted in background).

*The CO<sub>2</sub> adsorption on mixed oxides is related besides (pseudo)carbonates also with molecularly bound molecules characterized by IR signals around 2340 cm<sup>-1</sup>. Such species are formed on unsaturated cations Me<sup>n+</sup>. Molecular species have low stability – they are decomposed rapidly at RT during evacuation of gas from IR cell. Such species correspond to the lowest adsorption energies, the lowest adsorption heats observed (see calorimetric curves).*

*Majority of Me<sup>n+</sup> are engaged in basic Me<sup>n+</sup>-O<sup>2-</sup> pairs being responsible for relatively stable carbonate species with IR bands in region 1100 – 1800 cm<sup>-1</sup>.*

**Figure SI 1:**

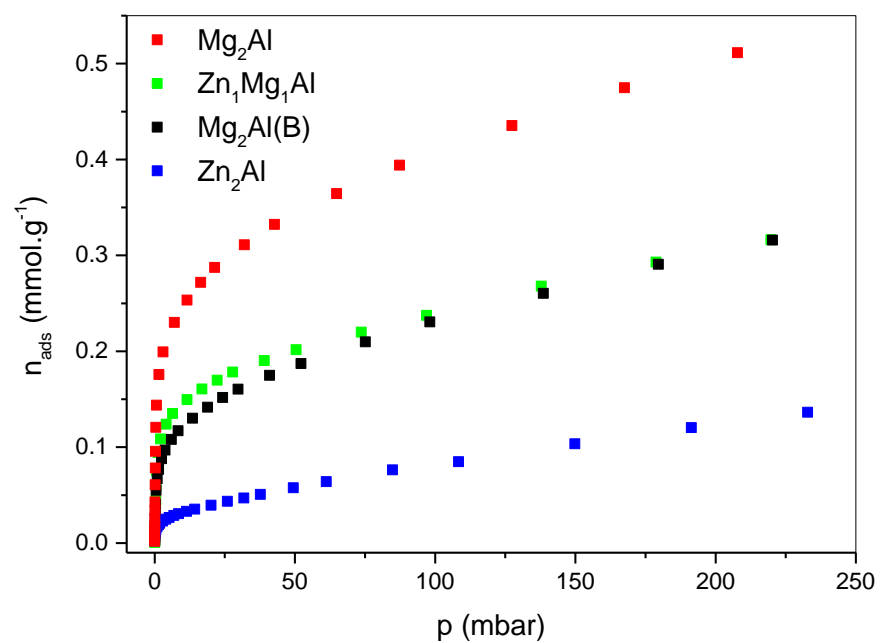

**Figure SI 2:**

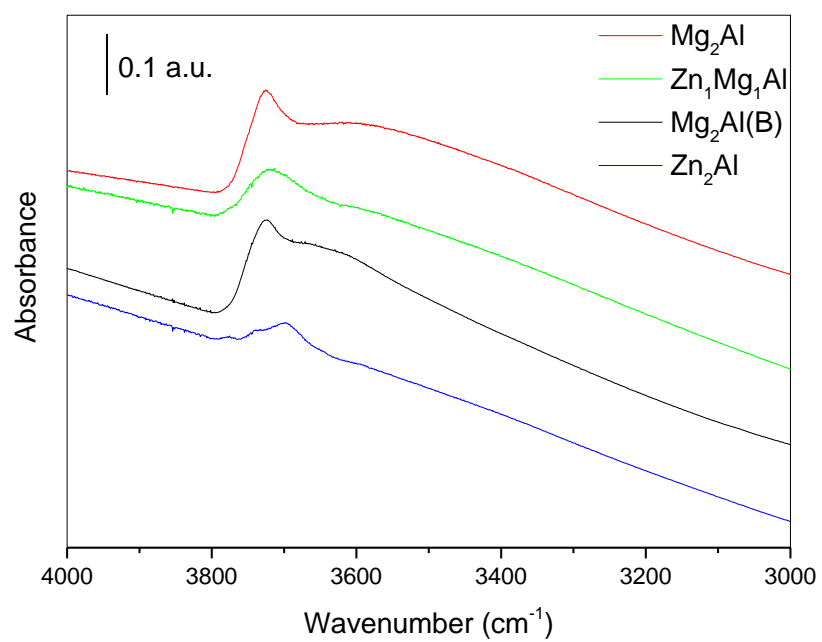

**Figure SI 3:**

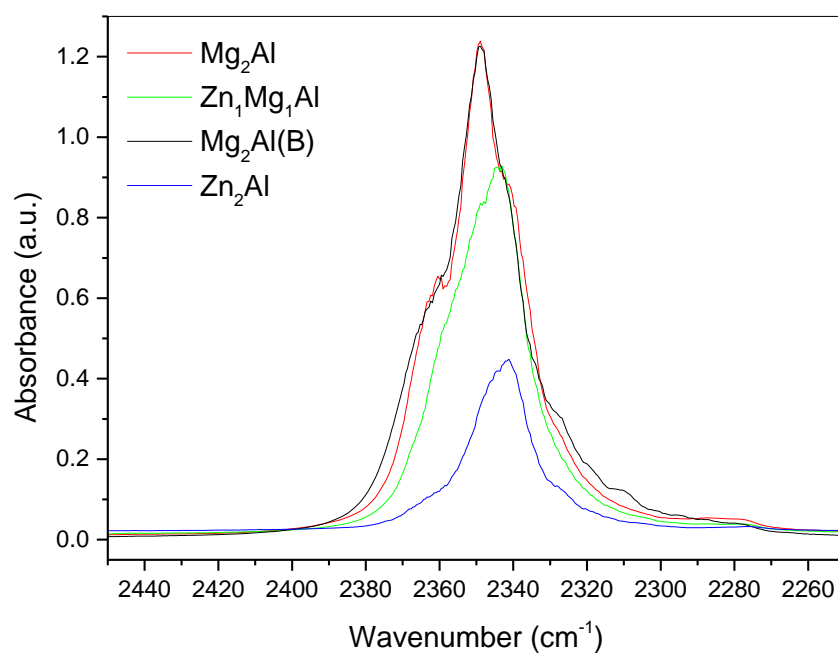

Supplement: Supplementary file 1 [file 8065568]
